# Supplementary material
Source: PubMed Central journal article supplement (PMC3726533)
Supplement: NIHMS165869-supplement-1_si_001.pdf [file NIHMS165869-supplement-1_si_001.pdf]

# Supporting Information

(10 pages)

**Title:** Network of Receptors Characterize B Cell Receptor Macro- and Micro- Clustering in a Monte Carlo Model

**Authors:** *A. Srinivas Reddy*<sup>1</sup>, *Sandeep Chilukuri*<sup>1,5</sup>, *Subhadip Raychaudhuri*<sup>1,2,3,4 †</sup>

<sup>1</sup>Department of Biomedical Engineering, <sup>2</sup>Biophysics Graduate Group, <sup>3</sup>Graduate Group in Immunology, <sup>4</sup>Graduate Group in Applied Mathematics, University of California-Davis, Davis,

<sup>5</sup>Department of Biotechnology, Indian Institute of Technology Madras, Chennai, India USA.

† Address correspondence to: [raychaudhuri@ucdavis.edu](mailto:raychaudhuri@ucdavis.edu)

**Figure S1:** Snapshots of the receptor molecules at the regular time intervals ( $1 \times 10^7$  time steps) of the clustering simulations for  $N=100$ ;  $L=30$ ;  $T=10^8$  considering four neighboring nodes.

**Figure S2a:** Snapshots of micro-clustering for various sets of receptor concentrations from 100 to 400 for  $L=30$ ;  $K=1$ ;  $T=10^8$  considering four neighboring nodes.

**Figure S2b:** Snapshots of micro-clustering for various sets of receptor concentrations from 100 to 500 for  $L=30$ ;  $K=2$ ;  $T=10^8$  considering four neighboring nodes.

**Figure S2c:** Snapshots of micro-clustering for various sets of receptor concentrations from 100 to 500 for  $L=30$ ;  $K=3$ ;  $T=10^8$  considering four neighboring nodes.

**Figure S3:** Snapshots of the macro clusters formed due to biased diffusion toward the largest cluster receptors for various sets of receptor concentrations from 100 to 500 for  $L=30$ ;  $K=4$ ;  $T=10^8$  considering four neighboring nodes.

**Figure S4a:** Snapshots of micro-clustering for various sets of receptor concentrations from 100 to 400 for  $L=30$ ;  $K=1$ ;  $T=10^8$  considering eight neighboring nodes.

**Figure S4b:** Snapshots of micro-clustering for various sets of receptor concentrations from 100 to 400 for  $L=30$ ;  $K=2$ ;  $T=10^8$  considering eight neighboring nodes.

**Figure S4c:** Snapshots of micro-clustering for various sets of receptor concentrations from 100 to 400 for  $L=30$ ;  $K=3$ ;  $T=10^8$  considering eight neighboring nodes.

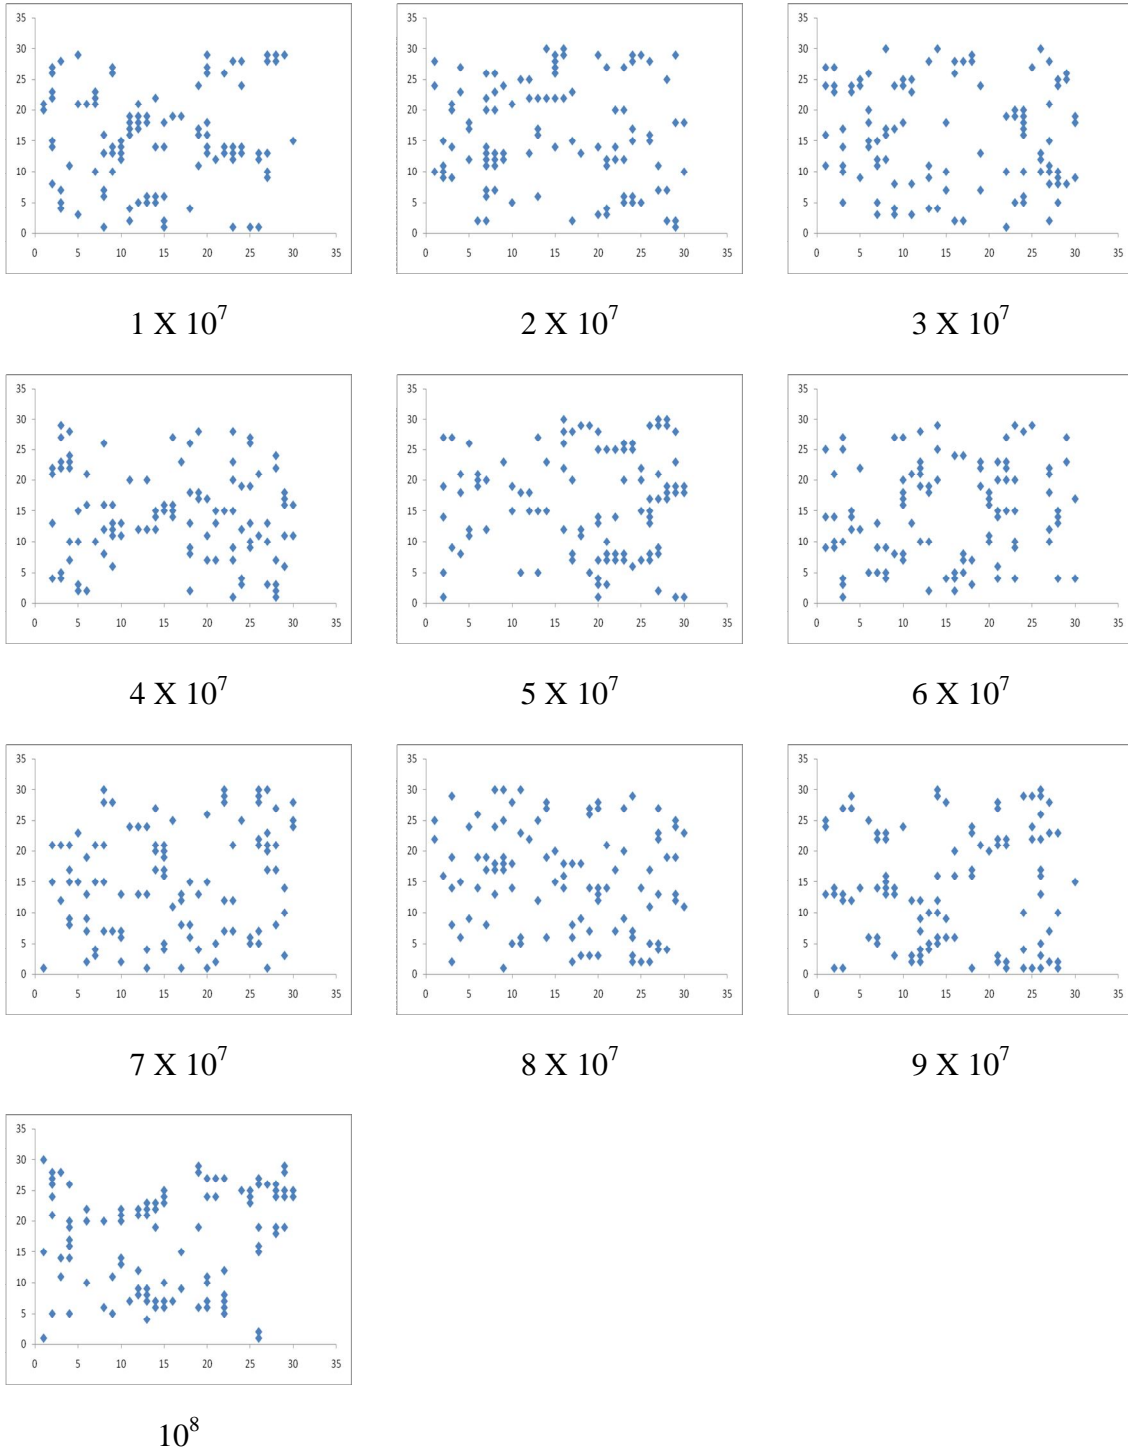

**Figure S1:** Snapshots of the receptor molecules at the regular time intervals ( $1 \times 10^7$  time steps) of the clustering simulations for  $N=100$ ;  $L=30$ ;  $K=1$ ;  $T=10^8$  considering four neighboring nodes.

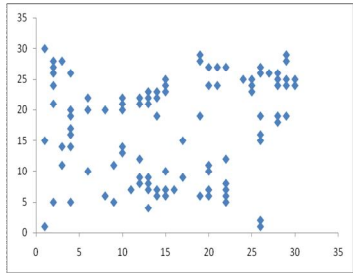

N=100

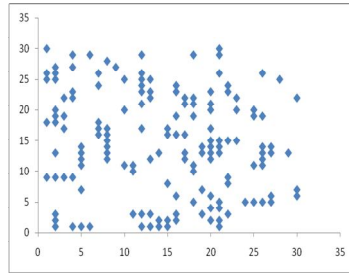

N=150

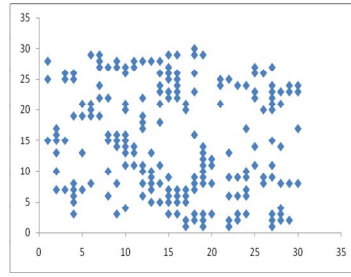

N=200

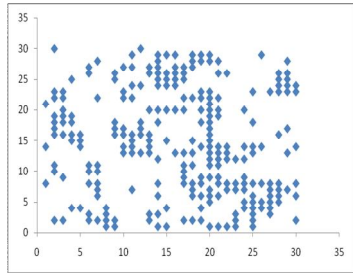

N=250

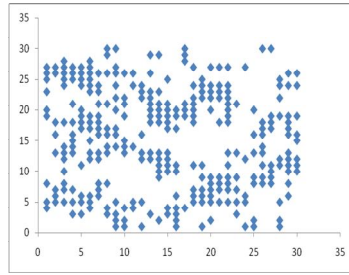

N=300

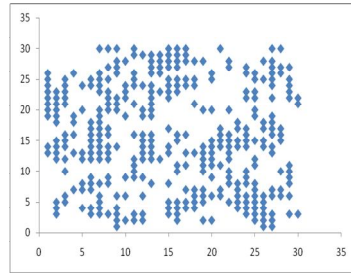

N=350

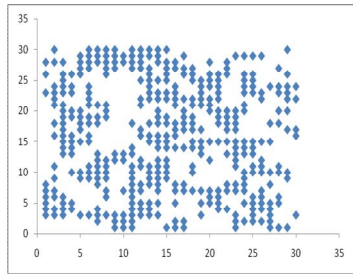

N=400

**Figure S2a:** Snapshots of micro-clustering for various sets of receptor concentrations from 100 to 400 for  $L=30$ ;  $K=1$ ;  $T=10^8$  considering four neighboring nodes.

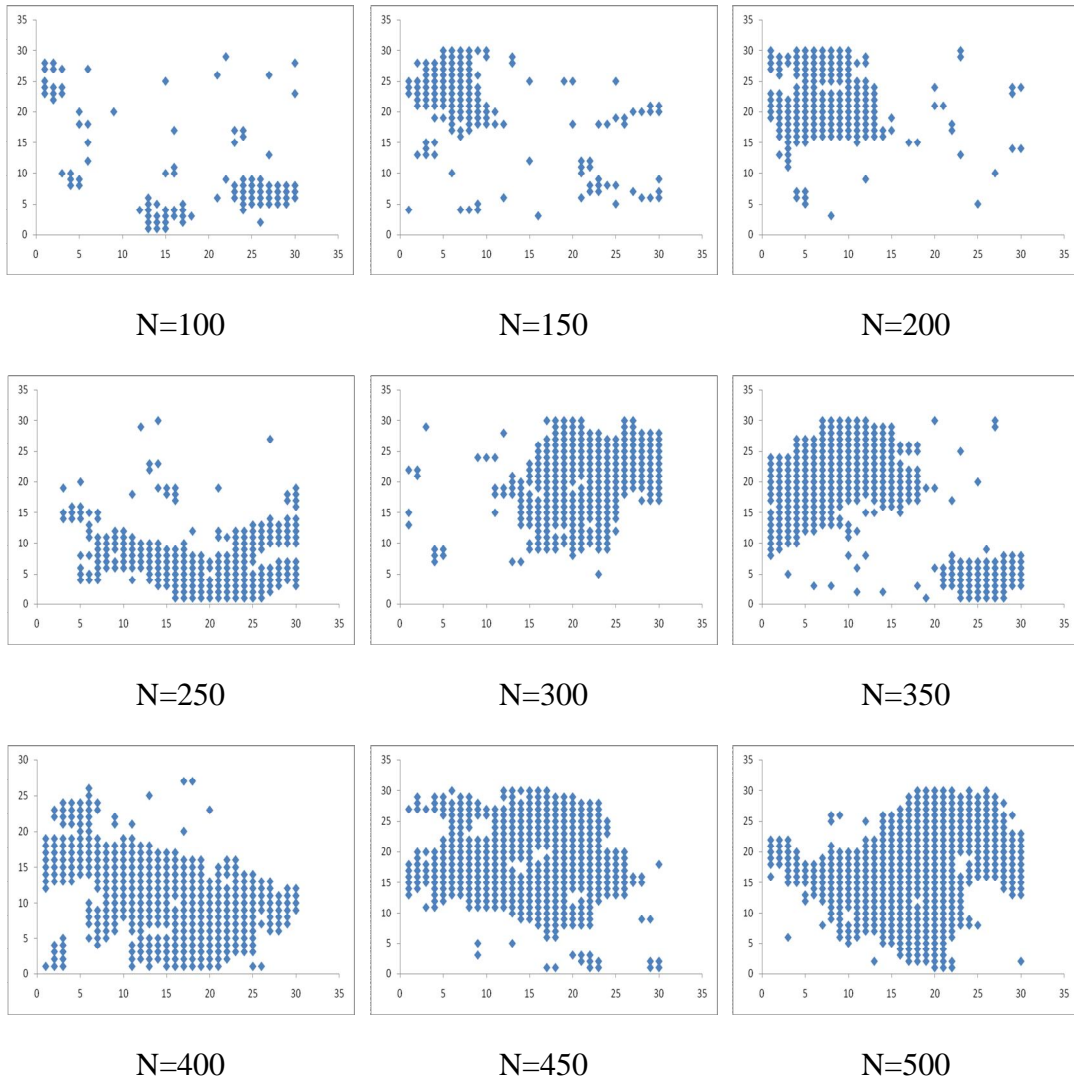

**Figure S2b:** Snapshots of micro-clustering for various sets of receptor concentrations from 100 to 500 for  $L=30$ ;  $K=2$ ;  $T=10^8$  considering four neighboring nodes.

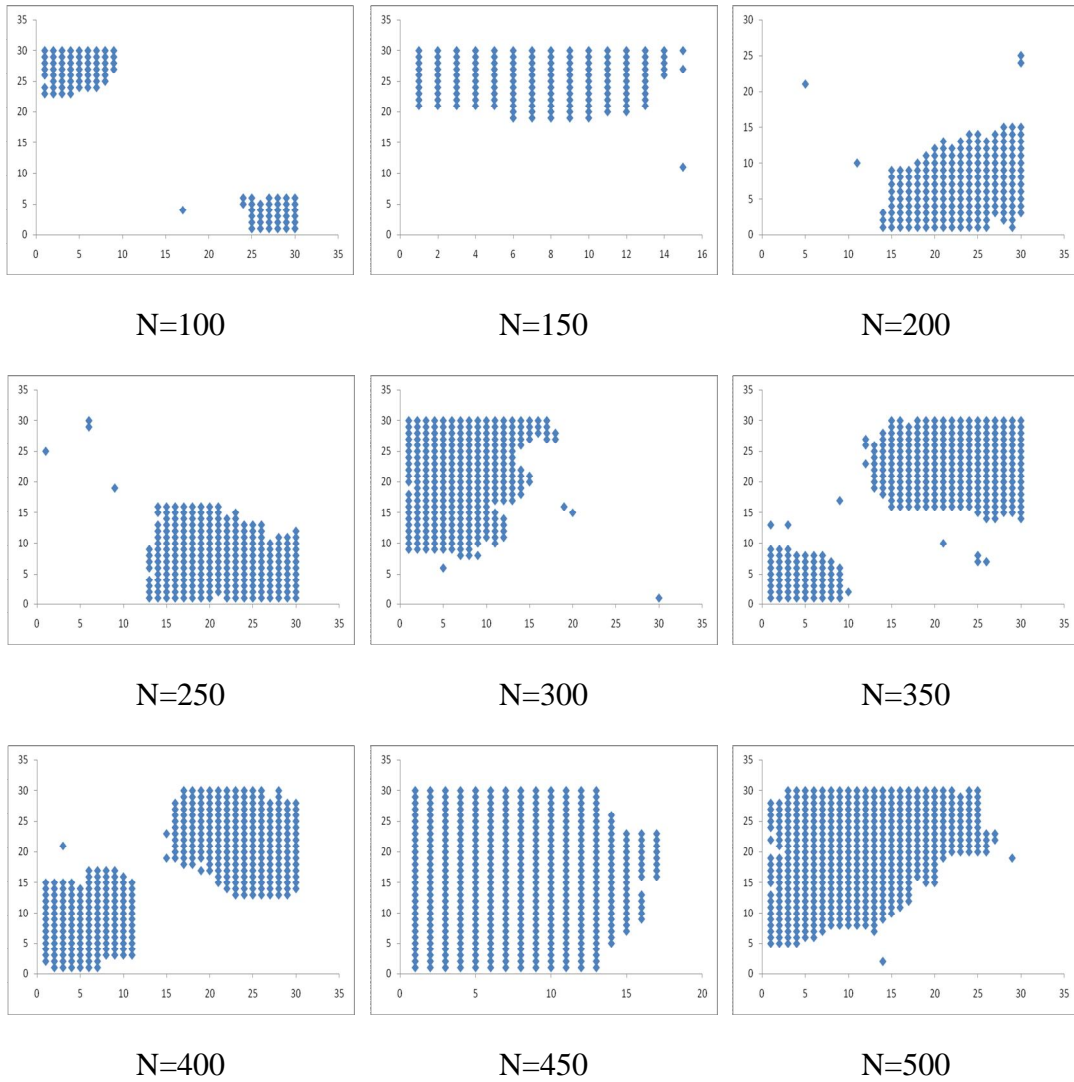

**Figure S2c:** Snapshots of micro-clustering for various sets of receptor concentrations from 100 to 500 for  $L=30$ ;  $K=3$ ;  $T=10^8$  considering four neighboring nodes.

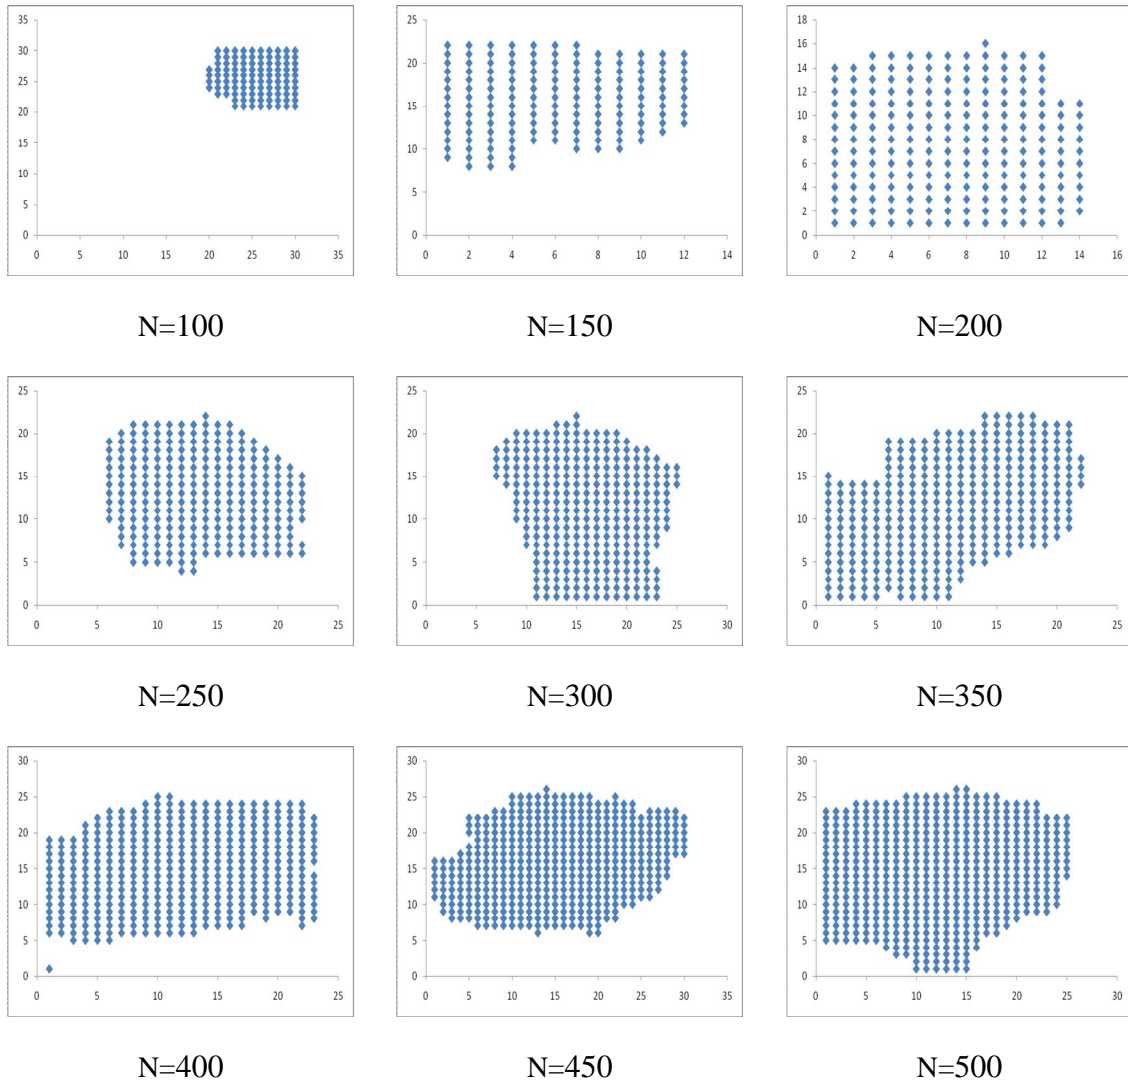

**Figure S3:** Snapshots of the macro clusters formed due to biased diffusion toward the largest cluster receptors for various sets of receptor concentrations from 100 to 500 for  $L=30$ ;  $K=4$ ;  $T=10^8$  considering four neighboring nodes.

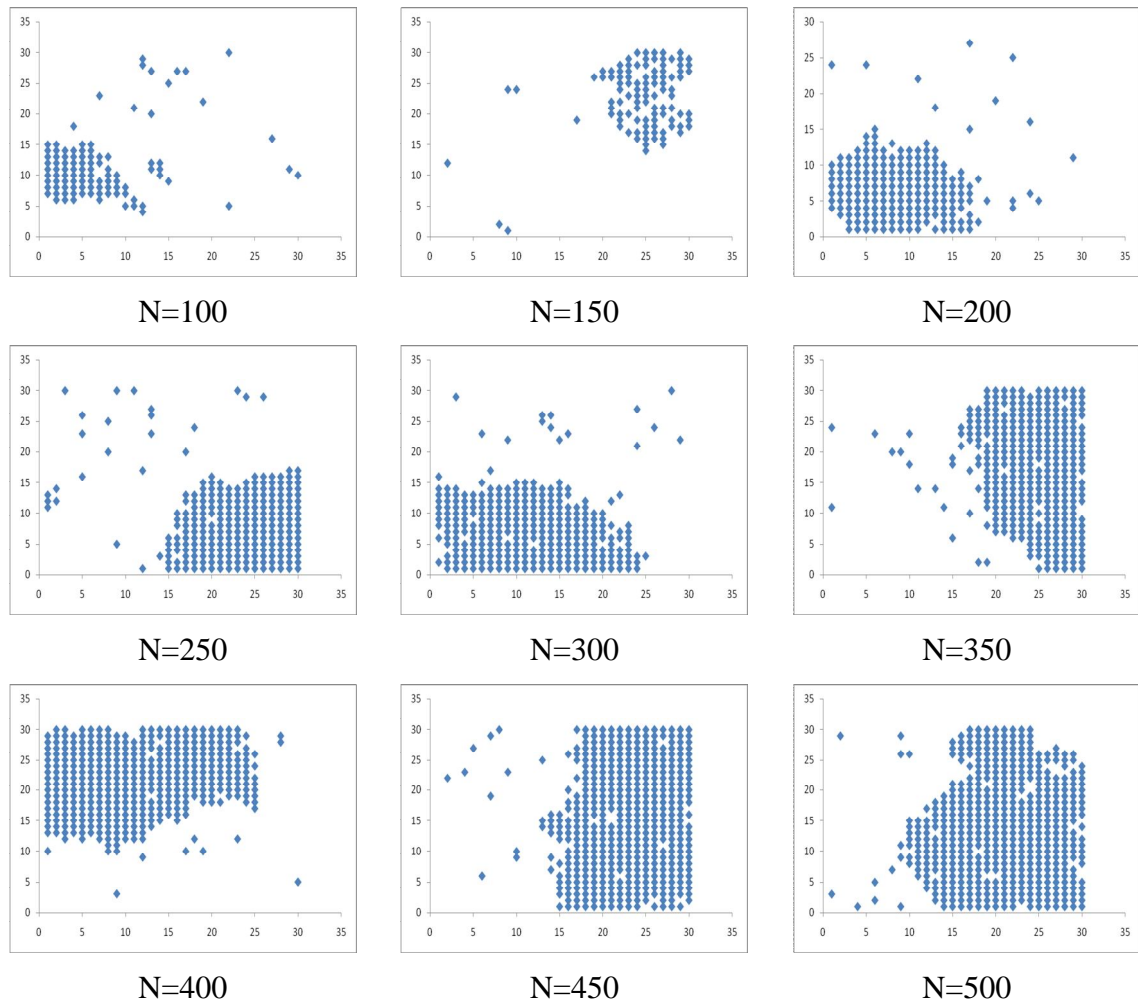

**Figure S4a:** Snapshots of micro-clustering for various sets of receptor concentrations from 100 to 400 for  $L=30$ ;  $K=1$ ;  $T=10^8$  considering eight neighboring nodes.



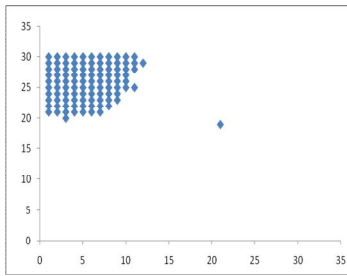

N=100

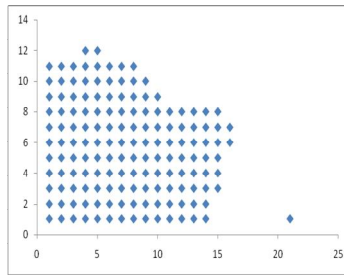

N=150

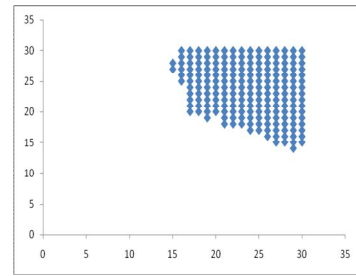

N=200

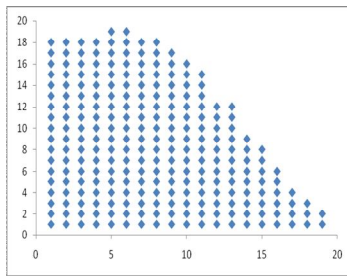

N=250

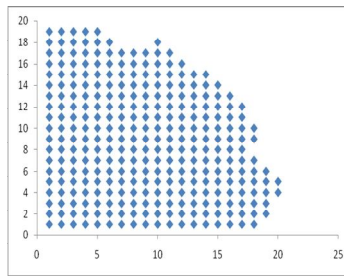

N=300

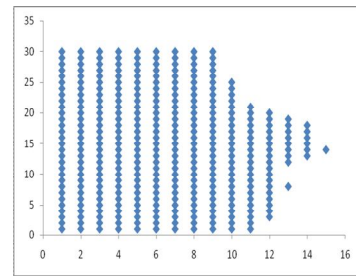

N=350

**Figure S4b:** Snapshots of micro-clustering for various sets of receptor concentrations from 100 to 400 for  $L=30$ ;  $K=2$ ;  $T=10^8$  considering eight neighboring nodes.

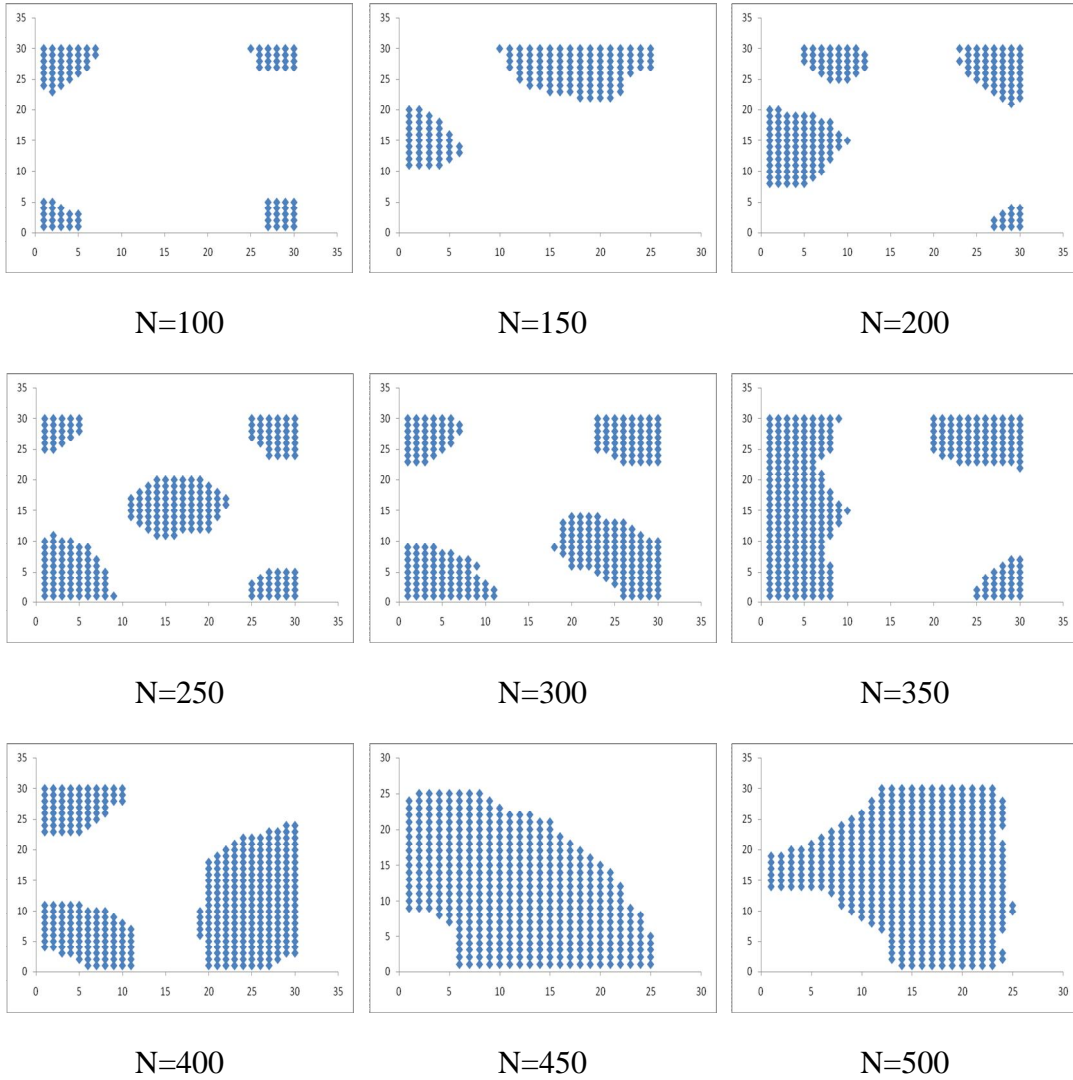

**Figure S4c:** Snapshots of micro-clustering for various sets of receptor concentrations from 100 to 400 for  $L=30$ ;  $K=3$ ;  $T=10^8$  considering eight neighboring nodes.
